# Supplementary material for: Liprin-α4 Is Required for Nickel Induced Receptor Protein Tyrosine Phosphatase-Leukocyte Antigen Related Receptor F (RPTP-LAR) Activity
Source: PubMed Central journal article supplement (PMC3150438; doi:10.1371/journal.pone.0022764), 2011-08-04
Supplement: pone.0022764.s003.pdf [file pone.0022764.s003.pdf]

Supplemental Table 1. Complete list of 272 genes differentially expressed more than 2-fold after nickel exposure

| <b>Affymetrix ID</b> | <b>Gene Symbol</b> | <b>Ni vs control</b> | <b>Regulation Ni</b> |
|----------------------|--------------------|----------------------|----------------------|
| 8153002              | NDRG1              | 10.28                | up                   |
| 8155083              | CA9                | 10.22                | up                   |
| 7928308              | DDIT4              | 9.59                 | up                   |
| 8081288              | TMEM45A            | 9.20                 | up                   |
| 7961891              | BHLHB3             | 8.85                 | up                   |
| 8135915              | HIG2               | 8.21                 | up                   |
| 8086961              | PFKFB4             | 7.97                 | up                   |
| 7926037              | PFKFB3             | 7.14                 | up                   |
| 8004408              | FGF11              | 5.99                 | up                   |
| 8122265              | TNFAIP3            | 5.99                 | up                   |
| 8004360              | KCTD11             | 5.89                 | up                   |
| 7989365              | RORA               | 5.32                 | up                   |
| 8136940              | FAM139A            | 4.76                 | up                   |
| 8119898              | VEGFA              | 4.64                 | up                   |
| 8113709              | LOX                | 4.63                 | up                   |
| 8083494              | MME                | 4.52                 | up                   |
| 7909104              | PCTK3              | 4.50                 | up                   |
| 8062190              | SPAG4              | 4.15                 | up                   |
| 8160297              | ADFP               | 4.13                 | up                   |
| 8150186              | RNF122             | 4.11                 | up                   |
| 8136954              | FAM139B            | 4.09                 | up                   |
| 8065948              | FER1L4             | 4.07                 | up                   |
| 7946641              | GALNTL4            | 4.00                 | up                   |
| 8064790              | RASSF2             | 3.87                 | up                   |
| 8072678              | HMOX1              | 3.85                 | up                   |
| 8038261              | GYS1               | 3.84                 | up                   |
| 8055465              | CXCR4              | 3.82                 | up                   |
| 7900540              | FAM80A             | 3.74                 | up                   |
| 8049825              | HDLBP              | 3.73                 | up                   |
| 8083223              | C3orf58            | 3.71                 | up                   |
| 7953532              | ENO2               | 3.69                 | up                   |
| 8097282              | SPRY1              | 3.69                 | up                   |
| 7908879              | PPFIA4             | 3.69                 | up                   |
| 7920642              | MUC1               | 3.64                 | up                   |
| 7995292              | SLC6A8             | 3.63                 | up                   |
| 8111932              | CCL28              | 3.61                 | up                   |
| 8048489              | ANKZF1             | 3.60                 | up                   |
| 7912157              | ERRF1              | 3.60                 | up                   |
| 8086517              | CDCP1              | 3.60                 | up                   |
| 8128123              | RRAGD              | 3.54                 | up                   |
| 8029219              | TMEM145            | 3.51                 | up                   |
| 8077441              | BHLHB2             | 3.51                 | up                   |
| 8115851              | STC2               | 3.50                 | up                   |
| 8149629              | GFRA2              | 3.47                 | up                   |
| 7987248              | GOLGA8A            | 3.46                 | up                   |
| 8059111              | ABCB6              | 3.40                 | up                   |
| 7987279              | GOLGA8B            | 3.37                 | up                   |
| 8083594              | PTX3               | 3.32                 | up                   |
| 8105191              | PARP8              | 3.30                 | up                   |
| 8113981              | P4HA2              | 3.28                 | up                   |
| 7973084              | ANG                | 3.27                 | up                   |
| 7985587              | SCAND2             | 3.21                 | up                   |

| <b>Affymetrix ID</b> | <b>Gene Symbol</b> | <b>Ni vs control</b> | <b>Regulation Ni</b> |
|----------------------|--------------------|----------------------|----------------------|
| 7934278              | P4HA1              | 3.18                 | up                   |
| 8112841              | HOMER1             | 3.14                 | up                   |
| 7943413              | BIRC3              | 3.14                 | up                   |
| 8131067              | GPR146             | 3.13                 | up                   |
| 8046408              | PDK1               | 3.13                 | up                   |
| 8056837              | GPR155             | 3.10                 | up                   |
| 7934997              | PPP1R3C            | 3.06                 | up                   |
| 7962183              | AK3L1              | 3.02                 | up                   |
| 7937079              | BNIP3              | 3.00                 | up                   |
| 8013660              | ALDOC              | 3.00                 | up                   |
| 8162940              | ABCA1              | 2.99                 | up                   |
| 8129985              | PLAGL1             | 2.96                 | up                   |
| 7965423              | BTG1               | 2.96                 | up                   |
| 8043283              | JMJD1A             | 2.91                 | up                   |
| 8060745              | SMOX               | 2.90                 | up                   |
| 8089596              | WDR52              | 2.83                 | up                   |
| 8085033              | LMLN               | 2.82                 | up                   |
| 8020847              | DTNA               | 2.79                 | up                   |
| 8042942              | HK2                | 2.78                 | up                   |
| 7964460              | DDIT3              | 2.76                 | up                   |
| 8093053              | TFRC               | 2.73                 | up                   |
| 8154100              | VLDLR              | 2.72                 | up                   |
| 8024170              | HMHA1              | 2.72                 | up                   |
| 8083839              | GPR160             | 2.71                 | up                   |
| 7956631              | FAM119B            | 2.71                 | up                   |
| 8064766              | RNF24              | 2.71                 | up                   |
| 8166511              | PDK3               | 2.69                 | up                   |
| 8116096              | DDX41              | 2.68                 | up                   |
| 7915472              | SLC2A1             | 2.66                 | up                   |
| 8044766              | INSIG2             | 2.66                 | up                   |
| 7980828              | CCDC88C            | 2.65                 | up                   |
| 8053484              | ST3GAL5            | 2.64                 | up                   |
| 7905664              | SLC27A3            | 2.64                 | up                   |
| 8149825              | STC1               | 2.64                 | up                   |
| 8114845              | PRELID2            | 2.64                 | up                   |
| 8169263              | VSIG1              | 2.62                 | up                   |
| 8047565              | ALS2CR13           | 2.60                 | up                   |
| 8075483              | PIK3IP1            | 2.59                 | up                   |
| 8166714              | LANCL3             | 2.59                 | up                   |
| 7971015              | SMAD9              | 2.59                 | up                   |
| 8175016              | APLN               | 2.59                 | up                   |
| 7927876              | TET1               | 2.58                 | up                   |
| 8166184              | CA5B               | 2.57                 | up                   |
| 8127778              | FAM46A             | 2.56                 | up                   |
| 8159554              | UAP1L1             | 2.55                 | up                   |
| 7972805              | RAB20              | 2.53                 | up                   |
| 8018754              | CYGB               | 2.53                 | up                   |
| 8005765              | WSB1               | 2.51                 | up                   |
| 7952526              | CDON               | 2.51                 | up                   |
| 8083063              | SLC25A36           | 2.49                 | up                   |
| 8007931              | ITGB3              | 2.49                 | up                   |
| 8025402              | ANGPTL4            | 2.48                 | up                   |
| 8120992              | ZNF292             | 2.48                 | up                   |

| <b>Affymetrix ID</b> | <b>Gene Symbol</b> | <b>Ni vs control</b> | <b>Regulation Ni</b> |
|----------------------|--------------------|----------------------|----------------------|
| 7986687              | WHDC1L1            | 2.48                 | up                   |
| 8104568              | UNQ1870            | 2.47                 | up                   |
| 8086799              | CSPG5              | 2.47                 | up                   |
| 7979179              | ERO1L              | 2.45                 | up                   |
| 8088958              | GBE1               | 2.44                 | up                   |
| 8089606              | WDR52              | 2.44                 | up                   |
| 8171653              | MAP3K15            | 2.42                 | up                   |
| 7995362              | GPT2               | 2.42                 | up                   |
| 8110158              | ARL10              | 2.40                 | up                   |
| 8054054              | ANKRD36B           | 2.40                 | up                   |
| 7948229              | SLC43A3            | 2.39                 | up                   |
| 8149749              | TNFRSF10D          | 2.37                 | up                   |
| 8004331              | KCTD11             | 2.34                 | up                   |
| 8120880              | TPBG               | 2.33                 | up                   |
| 7938390              | ADM                | 2.31                 | up                   |
| 8054064              | ANKRD36B           | 2.30                 | up                   |
| 8078529              | STAC               | 2.30                 | up                   |
| 8175023              | ZDHHC9             | 2.30                 | up                   |
| 7913858              | PAQR7              | 2.30                 | up                   |
| 7931951              | SFMBT2             | 2.30                 | up                   |
| 8015868              | MPP2               | 2.28                 | up                   |
| 7925250              | GNG4               | 2.27                 | up                   |
| 7993807              | TMEM159            | 2.26                 | up                   |
| 7978544              | EGLN3              | 2.26                 | up                   |
| 8027938              | UPK1A              | 2.25                 | up                   |
| 7928395              | FUT11              | 2.25                 | up                   |
| 8112592              | FOXD1              | 2.24                 | up                   |
| 8037430              | ZNF404             | 2.24                 | up                   |
| 8060344              | TRIB3              | 2.23                 | up                   |
| 7999614              | NPIP               | 2.22                 | up                   |
| 8115210              | TNIP1              | 2.22                 | up                   |
| 7962579              | AMIGO2             | 2.21                 | up                   |
| 7981514              | AHNAK2             | 2.20                 | up                   |
| 8011713              | CXCL16             | 2.20                 | up                   |
| 8096385              | HERC3              | 2.20                 | up                   |
| 7921099              | CRABP2             | 2.20                 | up                   |
| 8088642              | LRIG1              | 2.19                 | up                   |
| 8139488              | IGFBP3             | 2.19                 | up                   |
| 7989501              | CA12               | 2.19                 | up                   |
| 8093258              | IQCG               | 2.19                 | up                   |
| 8068022              | MIRN155            | 2.19                 | up                   |
| 8113073              | ARRDC3             | 2.19                 | up                   |
| 8005475              | TRIM16L            | 2.18                 | up                   |
| 8113214              | GLRX               | 2.18                 | up                   |
| 8070557              | ZNF295             | 2.18                 | up                   |
| 8035177              | SLC35E1            | 2.18                 | up                   |
| 8162276              | NFIL3              | 2.17                 | up                   |
| 7942674              | TSKU               | 2.17                 | up                   |
| 7984922              | MPI                | 2.17                 | up                   |
| 8072009              | CRYBB2P1           | 2.17                 | up                   |
| 8043697              | ANKRD36B FLJ40     | 2.17                 | up                   |
| 7960143              | ZNF84              | 2.16                 | up                   |
| 8070819              | PTTG1IP            | 2.16                 | up                   |

| <b>Affymetrix ID</b> | <b>Gene Symbol</b> | <b>Ni vs control</b> | <b>Regulation Ni</b> |
|----------------------|--------------------|----------------------|----------------------|
| 7912520              | NPPB               | 2.16                 | up                   |
| 7905918              | EFNA3              | 2.16                 | up                   |
| 8084232              | YEATS2             | 2.15                 | up                   |
| 7938183              | ZNF215             | 2.15                 | up                   |
| 7930398              | MXI1               | 2.15                 | up                   |
| 7960744              | C1R                | 2.14                 | up                   |
| 7985016              | SNX33              | 2.14                 | up                   |
| 8168438              | UPRT               | 2.13                 | up                   |
| 7956301              | LRP1               | 2.13                 | up                   |
| 7984524              | PAQR5              | 2.12                 | up                   |
| 8003611              | FAM57A             | 2.12                 | up                   |
| 7997839              | CDT1               | 2.11                 | up                   |
| 8109120              | AFAP1L1            | 2.11                 | up                   |
| 8073007              | MAFF               | 2.10                 | up                   |
| 8093104              | TM4SF19            | 2.10                 | up                   |
| 8164810              | RALGDS             | 2.10                 | up                   |
| 8066431              | ADA                | 2.10                 | up                   |
| 7909545              | TRAF5              | 2.10                 | up                   |
| 8029580              | RELB               | 2.10                 | up                   |
| 7981943              | PAR5               | 2.10                 | up                   |
| 7962327              | SLC2A13            | 2.10                 | up                   |
| 7964872              | PTPRB              | 2.09                 | up                   |
| 7913593              | TCEA3              | 2.09                 | up                   |
| 8018793              | JMJD6              | 2.09                 | up                   |
| 8172425              | SLC38A5            | 2.08                 | up                   |
| 8149986              | ZNF395 FBXO16      | 2.07                 | up                   |
| 8065920              | FER1L4             | 2.07                 | up                   |
| 8008627              | NOG                | 2.05                 | up                   |
| 8013022              | C17orf76           | 2.05                 | up                   |
| 8010770              | SLC16A3            | 2.05                 | up                   |
| 8098604              | ANKRD37            | 2.05                 | up                   |
| 8068024              | JAM2               | 2.05                 | up                   |
| 7979663              | RAB15              | 2.05                 | up                   |
| 8144378              | AGPAT5             | 2.05                 | up                   |
| 7953603              | C1S                | 2.05                 | up                   |
| 7930074              | NFKB2              | 2.04                 | up                   |
| 8145454              | BNIP3L             | 2.04                 | up                   |
| 8107133              | PAM                | 2.04                 | up                   |
| 7955142              | CACNB3             | 2.04                 | up                   |
| 8074227              | CECR5              | 2.03                 | up                   |
| 7993624              | SYT17              | 2.03                 | up                   |
| 8160332              | MLLT3              | 2.02                 | up                   |
| 8049448              | CENTG2             | 2.02                 | up                   |
| 8143270              | ZC3HAV1L           | 2.01                 | up                   |
| 7933084              | NAMPT              | 2.01                 | up                   |
| 8129953              | HIVEP2             | 2.01                 | up                   |
| 7980485              | DIO2               | 6.27                 | down                 |
| 8173732              | TAF9B              | 5.35                 | down                 |
| 8111941              | HMGCS1             | 4.88                 | down                 |
| 7961142              | OLR1               | 4.67                 | down                 |
| 8140650              | SEMA3E             | 3.92                 | down                 |
| 8124196              | DCDC2              | 3.24                 | down                 |
| 8019392              | FASN               | 3.02                 | down                 |

| <b>Affymetrix ID</b> | <b>Gene Symbol</b> | <b>Ni vs control</b> | <b>Regulation Ni</b> |
|----------------------|--------------------|----------------------|----------------------|
| 8129458              | ARHGAP18           | 2.83                 | down                 |
| 8006433              | CCL2               | 2.81                 | down                 |
| 8098195              | SC4MOL             | 2.78                 | down                 |
| 8144669              | FDFT1              | 2.77                 | down                 |
| 7951662              | CRYAB              | 2.68                 | down                 |
| 8025828              | LDLR               | 2.67                 | down                 |
| 8106280              | HMGCR              | 2.66                 | down                 |
| 8138888              | PDE1C              | 2.60                 | down                 |
| 8108697              | PCDHB5             | 2.60                 | down                 |
| 8124380              | HIST1H1A           | 2.56                 | down                 |
| 8069689              | ADAMTS5            | 2.52                 | down                 |
| 8081657              | CD200              | 2.50                 | down                 |
| 7916584              | TACSTD2            | 2.48                 | down                 |
| 7904843              | PDZK1              | 2.43                 | down                 |
| 7931754              | IDI1               | 2.40                 | down                 |
| 7906900              | DDR2               | 2.39                 | down                 |
| 7954104              | ATF7IP             | 2.37                 | down                 |
| 7983650              | SLC27A2            | 2.34                 | down                 |
| 7934979              | ANKRD1             | 2.34                 | down                 |
| 8102342              | ELOVL6             | 2.32                 | down                 |
| 7962559              | SLC38A4            | 2.31                 | down                 |
| 8058552              | IDH1               | 2.27                 | down                 |
| 8154245              | PDCD1LG2           | 2.27                 | down                 |
| 8121734              | ASF1A              | 2.23                 | down                 |
| 8174201              | BEX1               | 2.22                 | down                 |
| 7947512              | DKFZP586H2123      | 2.21                 | down                 |
| 8045835              | GALNT5             | 2.21                 | down                 |
| 7915787              | PIK3R3             | 2.20                 | down                 |
| 8140686              | SEMA3D             | 2.20                 | down                 |
| 8051583              | CYP1B1             | 2.19                 | down                 |
| 8128383              | COQ3               | 2.17                 | down                 |
| 8135218              | LRRC17             | 2.16                 | down                 |
| 7902495              | NEXN               | 2.15                 | down                 |
| 7919591              | GCUD2              | 2.15                 | down                 |
| 8062041              | ACSS2              | 2.14                 | down                 |
| 7979241              | BMP4               | 2.14                 | down                 |
| 8023497              | ATP8B1             | 2.14                 | down                 |
| 7932584              | PRTFDC1            | 2.13                 | down                 |
| 8175052              | AIFM1              | 2.13                 | down                 |
| 8111772              | DAB2               | 2.12                 | down                 |
| 7916432              | DHCR24             | 2.11                 | down                 |
| 8128606              | RTN4IP1            | 2.10                 | down                 |
| 8037272              | PSG7               | 2.10                 | down                 |
| 8109597              | UBLCP1             | 2.09                 | down                 |
| 7961365              | MANSC1             | 2.09                 | down                 |
| 7962375              | PRICKLE1           | 2.08                 | down                 |
| 7965200              | CCDC59             | 2.08                 | down                 |
| 8106193              | UTP15              | 2.07                 | down                 |
| 8140668              | SEMA3A             | 2.07                 | down                 |
| 8151296              | LACTB2             | 2.07                 | down                 |
| 7958565              | MVK                | 2.06                 | down                 |
| 8148280              | SQLE               | 2.05                 | down                 |
| 7968872              | DNAJC15            | 2.05                 | down                 |

| <b>Affymetrix ID</b> | <b>Gene Symbol</b> | <b>Ni vs control</b> | <b>Regulation Ni</b> |
|----------------------|--------------------|----------------------|----------------------|
| 7925480              | FH                 | <b>2.04</b>          | down                 |
| 7905986              | FDPS               | <b>2.02</b>          | down                 |
| 8067140              | CYP24A1            | <b>2.02</b>          | down                 |
| 8170590              | NSDHL              | <b>2.02</b>          | down                 |
| 7914557              | SYNC1              | <b>2.02</b>          | down                 |
| 8100347              | SCFD2              | <b>2.01</b>          | down                 |
| 8091411              | TM4SF1             | <b>2.00</b>          | down                 |
| 8008588              | HLF                | <b>2.00</b>          | down                 |
